# Supplementary material for: The Healing Hearts Together Randomized Controlled Trial and the COVID-19 Pandemic: A Tutorial for Transitioning From an In-Person to a Web-Based Intervention
Source: PubMed Central journal article supplement (PMC8025918; doi:10.2196/25502), 2021-04-06
Supplement: jmir_v23i4e25502_app2.pdf [file jmir_v23i4e25502_app2.pdf]

## Hold Me Tight ® Healing Hearts Together (HHT) Satisfaction Survey

**Instructions:** Your thoughts and feedback are important to us and help us provide optimal services to our patients at the Heart Institute. Please take a few minutes to think about your experiences in group, and answer the following questions. We appreciate your honest and candid feedback.

1. Please indicate if you are a patient or spouse (please circle):    *patient*            *spouse*
2. How do you describe yourself?

*Man*
*Woman*
*Transgender*
*Do not identify as a man, woman, or transgender*

3. Overall, how did you like the group?

|                   |          |         |       |                |
|-------------------|----------|---------|-------|----------------|
| 1                 | 2        | 3       | 4     | 5              |
| Strongly Disliked | Disliked | Neutral | Liked | Strongly Liked |

4. Please rate the program on the following dimensions, where 1 = poor and 5 = excellent:

|                                 |   |   |   |   |   |
|---------------------------------|---|---|---|---|---|
| Content                         | 1 | 2 | 3 | 4 | 5 |
| Facilitator interactions        | 1 | 2 | 3 | 4 | 5 |
| Usefulness of session exercises | 1 | 2 | 3 | 4 | 5 |
| Usefulness of the homework      | 1 | 2 | 3 | 4 | 5 |
| Content of video clips          | 1 | 2 | 3 | 4 | 5 |

5. Please rate each of the sessions, where 1 = poor and 5 = excellent:

|                                                |   |   |   |   |   |
|------------------------------------------------|---|---|---|---|---|
| Session 1: Understanding love and attachment   | 1 | 2 | 3 | 4 | 5 |
| Session 2: The voices of patients and partners | 1 | 2 | 3 | 4 | 5 |
| Session 3: Recognizing demon dialogues         | 1 | 2 | 3 | 4 | 5 |
| Session 4: Finding the raw spots               | 1 | 2 | 3 | 4 | 5 |
| Session 5: Becoming open and responsive        | 1 | 2 | 3 | 4 | 5 |

|                                                  |   |   |   |   |   |
|--------------------------------------------------|---|---|---|---|---|
| Session 6: Forgiving injuries and trusting again | 1 | 2 | 3 | 4 | 5 |
| Session 7: Bonding Through Sex and touch         | 1 | 2 | 3 | 4 | 5 |
| Session 8: Keeping your love alive               | 1 | 2 | 3 | 4 | 5 |

6. How many homework assignments did you complete (there were 7 in total)?

- 0-2
- 3-4
- 5-6
- All

7. During the course of this program did you learn something:

About yourself? *Yes No*  
 About your partner? *Yes No*  
 About the impact that you have on one another? *Yes No*

8. Please rate how you felt about the amount of discussion between group members. Please circle one:

*Not enough*

*Just right*

*Too much*

9. Has this HHT group changed your interactions with your partner regarding cardiac health management? If so, would you say your interactions are (please circle):

*worse*

*the same*

*better*

Please describe.

---



---



---



---



---

10. Overall, did you get the outcomes that you were looking for?

- Yes
- No

Please explain.

---

---

---

---

11. What did you like most about this program?

---

---

---

---

---

---

---

---

12. What do you wish could have been added or done differently in this program?

---

---

---

---

---

---

---

---

13. Would you recommend this program to others?

- Yes
- No

Please tell us why?

---

---

---

---

---

---

---

14. Please use the space below for any additional comments for us.

---

---

---

---

---

---

---

---

**If your Healing Hearts Together group sessions took place online,  
please complete the additional questions below.**

The following questions are focused on your experience with the virtual platform.

15. Before the first session, were you concerned about experiencing difficulty when using technology?

- Yes
- No

16. Can you please elaborate on your concerns about difficulty using technology?

---

---

---

---

---

---

---

---

17. What type of device(s) did you use for your virtual group sessions?

- Desktop computer
- Laptop
- Tablet
- Smartphone video
- Smartphone voice only

18. Were there any problems with the following? Select the ones that apply.

- Quality of the audio (sound)
- Quality of the video (visual)
- Software set-up/Login process
- Scheduling process
- No problems

19. How much did the problem(s) impact your satisfaction with the virtual visit?

- The problem(s) did not impact my satisfaction with the virtual visit
- The problem(s) somewhat reduced my satisfaction
- The problem(s) greatly reduced my satisfaction

20. Did you need any technical help before or during your virtual visit?

- Yes
- No

21. Please add any comments about the technical help you required.

---

---

---

---

---

---

---

**THANK YOU FOR TAKING THE TIME TO COMPLETE THIS SURVEY!**
